# Supplementary material
Source: MDPI journal article supplement (https://www.mdpi.com/2313-0105/10/1/30)
Supplement: s1 [file s1]

# Constructing a LiPON layer on a 3D lithium metal anode as an artificial solid electrolyte interphase with long-term stability

Qianmu Pan <sup>†</sup>, Yongkun Yu <sup>†</sup>, Yuxin Zhu, Chunli Shen, Minjian Gong, Kui Yan <sup>\*</sup> and Xu Xu <sup>\*</sup>

International School of Materials Science and Engineering, Wuhan University of Technology,

Wuhan 430070, China; pqm@whut.edu.cn (Q.P.); yuyongkun@whut.edu.cn (Y.Y.);

zhuyuxin@whut.edu.cn (Y.Z.); scl@whut.edu.cn (C.S.);

gongminjian@whut.edu.cn (M.G.)

<sup>\*</sup> Correspondence: ykui@whut.edu.cn (K.Y.); xuxu@whut.edu.cn (X.X.)

<sup>†</sup> These authors contributed equally to this work.

**Keywords:** artificial SEI; 3D support skeleton; lithium metal anode.

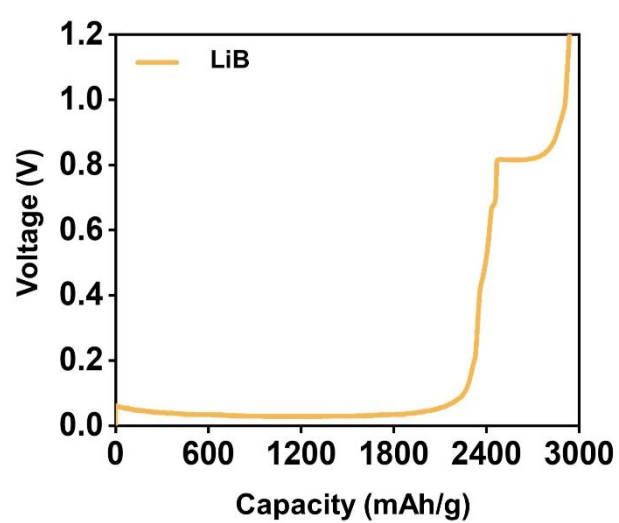

**Figure S1.** Charge curve of the LiB anode.

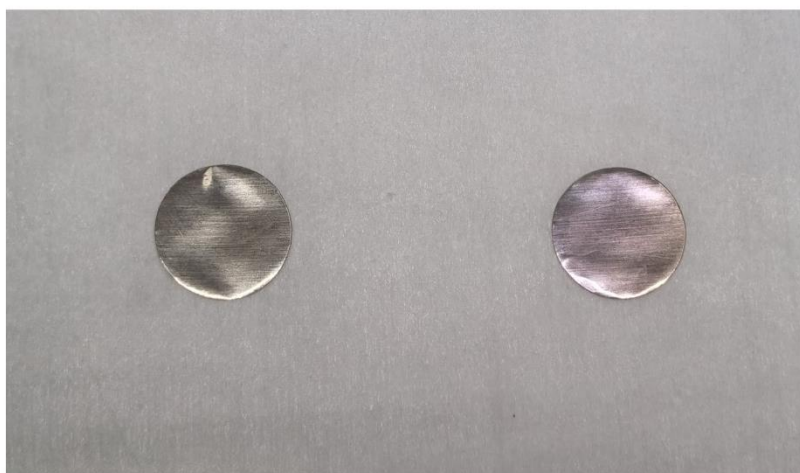

**Figure S2.** Optical pictures of LiB (left) and LiB@LiPON (right) anode.

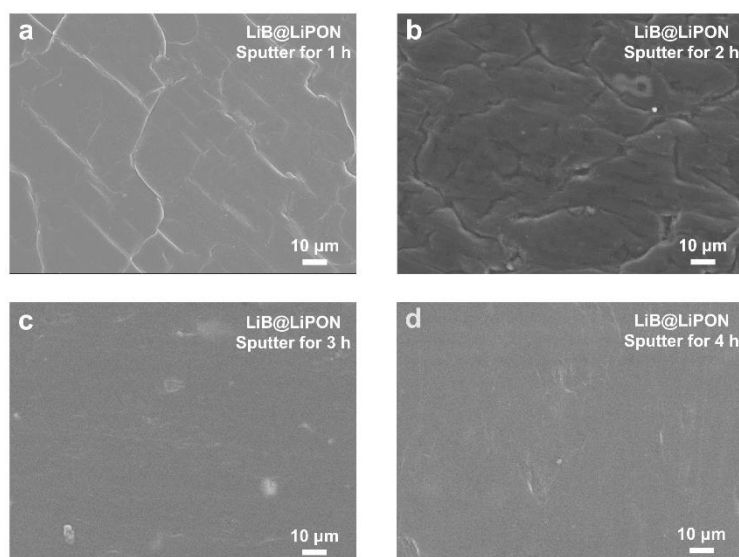

**Figure S3.** (a, b, c, d) SEM images of LiB@LiPON anode of 1 h-sputtering, 2 h-sputtering, 3 h-sputtering and 4 h-sputtering, respectively.

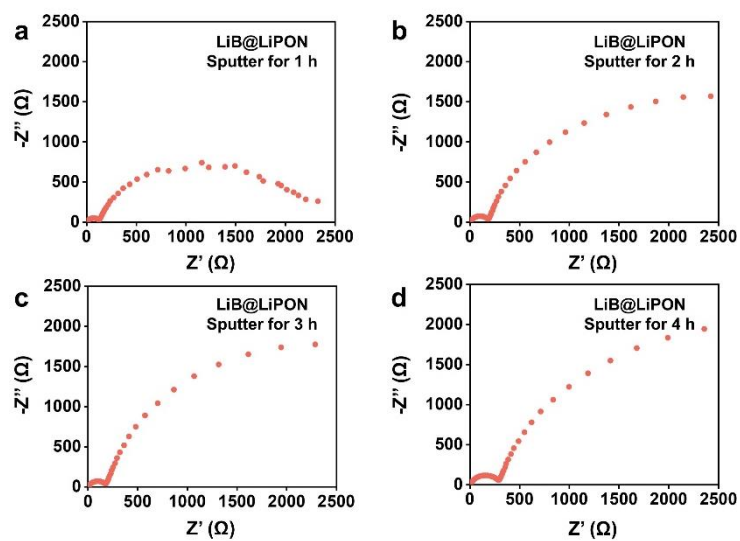

**Figure S4.** (a, b, c, d) EIS profiles of LiB@LiPON || LiB@LiPON symmetric batteries with 1 h-sputtering, 2 h-sputtering, 3 h-sputtering and 4 h-sputtering samples, respectively.

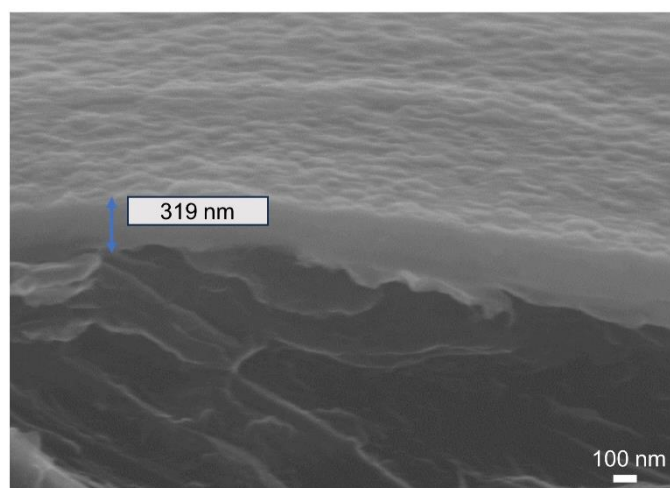

**Figure S5.** Cross-section SEM image of LiB@LiPON anode before cycling;

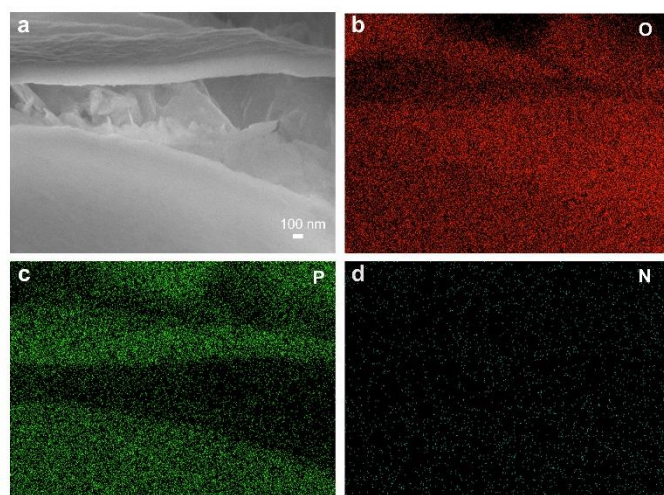

**Figure S6.** (a) Cross-section view of LiB@LiPON anode after cycling; (b-d) SEM elemental mapping images of the corresponding elemental mapping images of N, O, P.

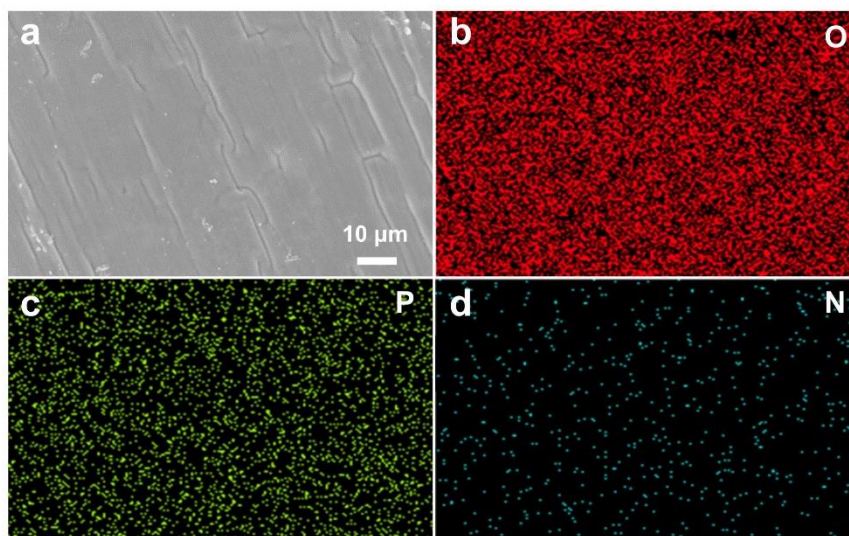

**Figure S7.** (a) Top-view SEM image of the cycled LiB@LiPON anode; (b-d) SEM elemental mapping images of Fig S6a.

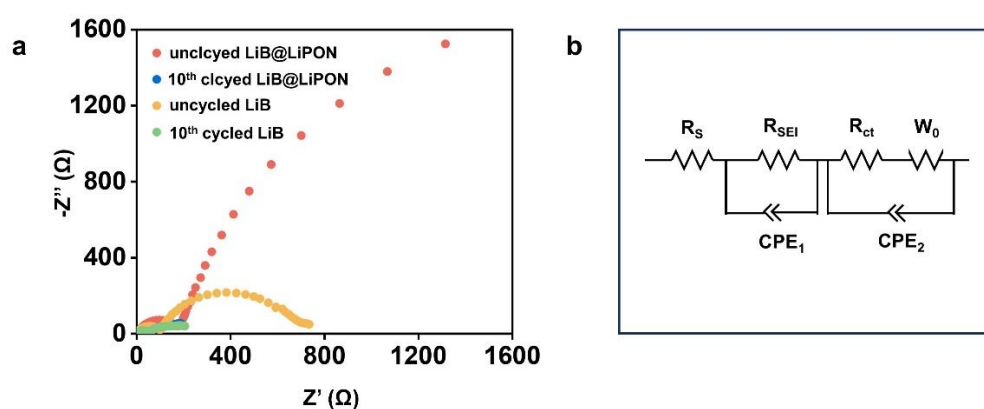

**Figure S8.** (a) overall view of high frequency area of EIS profile; (b) equivalent circuit model for fitting the impedance.

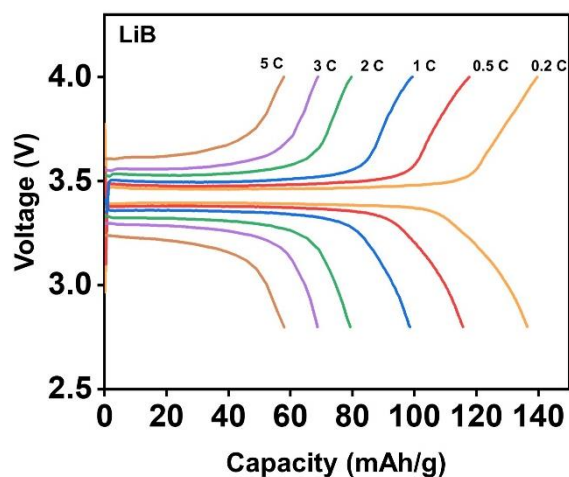

**Figure S9.** Charge-discharge curves of LiB || LFP at different current densities.

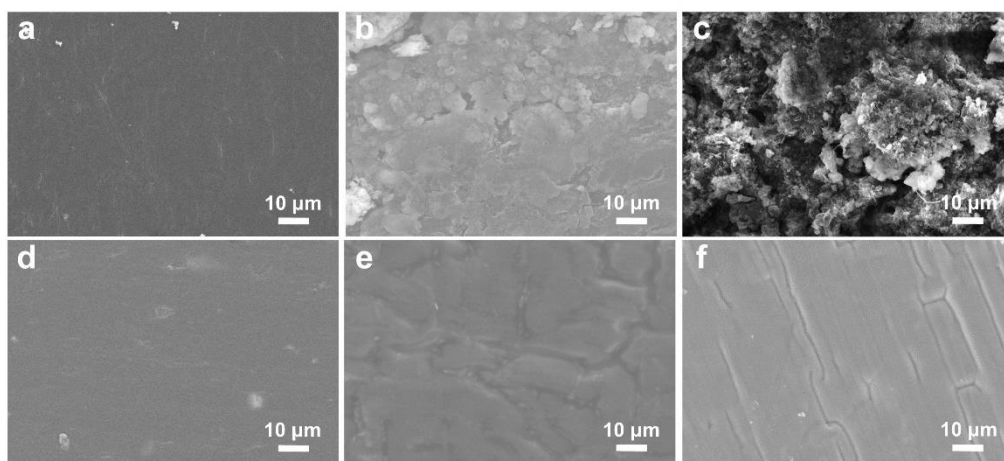

**Figure S10.** (a) Top-view SEM image of LiB anode before cycling; (b, c) top-view SEM images of LiB anode after 1<sup>st</sup>, 100<sup>th</sup> cycle, respectively; (d) top-view SEM image of LiB@LiPON anode before cycling; (e, f) top-view SEM images of LiB@LiPON anode after 1<sup>st</sup>, 100<sup>th</sup> cycle, respectively.

**Table S1.** some other work about electrochemical performance of using LiPON as an interface.

| Anode   | Preparation method | Coulombic efficiency        | Capacity retention   | Reference |
|---------|--------------------|-----------------------------|----------------------|-----------|
| Silicon | RF sputtering      | 67 % for first cycle        | 91 % for 150 cycles  | [1]       |
| Silicon | RF sputtering      | 97 % for 100 cycles         | 99 % for 100 cycles  | [2]       |
| Li      | RF sputtering      | Almost 100 % for 300 cycles | 58 % for 300 cycles  | [3]       |
| Li      | RF sputtering      | <90% for 40 cycles          | 87.8 % for 40 cycles | [4]       |
| Si-PAN  | RF sputtering      | <99 % for 100 cycles        | 85 % for 100 cycles  | [5]       |
| LiB     | RF sputtering      | 99.84 % for 400 cycles      | 92.9% for 400 cycles | This work |

**Reference:**

1. Reyes Jiménez, A.; Nölle, R.; Wagner, R.; Hüsker, J.; Kolek, M.; Schmuck, R.; Winter, M.; Placke, T., A step towards understanding the beneficial influence of a LiPON-based artificial SEI on silicon thin film anodes in lithium-ion batteries. *Nanoscale* **2018**, *10* (4), 2128-2137.
2. Li, J.; Dudney, N. J.; Nanda, J.; Liang, C., Artificial Solid Electrolyte Interphase To Address the Electrochemical Degradation of Silicon Electrodes. *ACS Applied Materials & Interfaces* **2014**, *6* (13), 10083-10088.
3. Zhang, Y.; Mei, Y.; Gao, X.; Xiao, Y.; Tang, Z.; Xiang, X.; Deng, J., Inhibition of lithium dendrites by a LiPON interlayer with Li<sup>+</sup> conductive and electron non-conductive dynamic properties based on Li<sub>7</sub>La<sub>3</sub>Zr<sub>2</sub>O<sub>12</sub> solid electrolyte. *Journal of Alloys and Compounds* **2024**, *971*.
4. Zhou, S.; Tian, R.; Wu, A.; Lin, L.; Huang, H., Fast Li<sup>+</sup> migration in LiPON electrolytes doped by multi-valent Fe ions. *Journal of Energy Chemistry* **2022**, *75*, 349-359.
5. Shrestha, S.; Kim, J.; Jeong, J.; Lee, H. J.; Kim, S. C.; Hah, H. J.; Oh, K.; Lee, S.-H., Effect of Amorphous LiPON Coating on Electrochemical Performance of LiNi<sub>0.8</sub>Mn<sub>0.1</sub>Co<sub>0.1</sub>O<sub>2</sub> (NMC811) in All Solid-State Batteries. *Journal of The Electrochemical Society* **2021**, *168* (6).
